# Supplementary material for: Comparative Hydrodynamic Study on Non-Aqueous Soluble Archaeological Wood Consolidants: Butvar B-98 and PDMS-OH Siloxanes
Source: MDPI journal article supplement (doi:10.3390/molecules27072133), 2022-03-25
Supplement: s1 [file s1]

## Supplementary Materials

**Table S1.** Apparent weight average molar masses  $M_{w,app}$  and polydispersity  $\mathcal{D}$  values obtained from sedimentation equilibrium of Butvar B-98.

| Concentration (mg/ml) | $M_{w,app}$ (kDa) | $\mathcal{D}$ ( $M_{z,app}/M_{w,app}$ ) |
|-----------------------|-------------------|-----------------------------------------|
| 0.5                   | 51.5              | 2.7                                     |
| 0.75                  | 39.2              | 2.4                                     |
| 1.0                   | 50.9              | 1.8                                     |
| 1.5                   | 50.2              | 2.1                                     |
| 2.0                   | 43.8              | 1.8                                     |
| 3.0                   | 41.1              | 1.7                                     |
| 4.0                   | 39.4              | 1.6                                     |

**Table S2.** Apparent weight average molar masses  $M_{w,app}$  and polydispersity  $\mathcal{D}$  values for PS36000 in isopropanol at different concentrations.

| Concentration (mg/mL) | <sup>a</sup> $M_{w,app}$ (kDa) | <sup>b</sup> $M_{w,app}$ (kDa) | $\mathcal{D}$ ( $M_{z,app}/M_{w,app}$ ) |
|-----------------------|--------------------------------|--------------------------------|-----------------------------------------|
| 0.5                   | 48.7                           | 44.4                           | 1.0                                     |
| 1.0                   | 49.0                           | 38.2                           | 1.3                                     |
| 2.0                   | 35.6                           | 34.4                           | 1.6                                     |
| 3.0                   | 29.1                           | 28.9                           | 1.0                                     |
| 4.0                   | 27.7                           | 26.8                           | 1.3                                     |

a: M\* method. b: hinge point method.

**Table S3.** Apparent weight average molar masses  $M_{w,app}$  and polydispersity  $\mathcal{D}$  values for PS18000 in isopropanol at different concentrations.

| Concentration (mg/mL) | <sup>a</sup> $M_{w,app}$ (kDa) | <sup>b</sup> $M_{w,app}$ (kDa) | $\mathcal{D}$ ( $M_{z,app}/M_{w,app}$ ) |
|-----------------------|--------------------------------|--------------------------------|-----------------------------------------|
| 1.0                   | 33.6                           | 31.0                           | 1.3                                     |
| 2.0                   | 29.8                           | 25.2                           | 1.3                                     |
| 3.0                   | 22.9                           | 18.5                           | 1.3                                     |
| 4.0                   | 22.3                           | 19.9                           | 1.4                                     |

a: M\* method. b: hinge point method.

**Table S4.** Apparent weight average molar masses  $M_{w,app}$  and polydispersity  $\mathcal{D}$  values for PS4200 in isopropanol at different concentrations.

| Concentration (mg/mL) | <sup>a</sup> $M_{w,app}$ (kDa) | <sup>b</sup> $M_{w,app}$ (kDa) | $\mathcal{D}$ ( $M_z/M_{w,app}$ ) |
|-----------------------|--------------------------------|--------------------------------|-----------------------------------|
| 1.0                   | 5.9                            | 5.2                            | 3.8                               |
| 1.5                   | 4.6                            | 3.8                            | 5.4                               |
| 2.0                   | 5.7                            | 5.1                            | 2.9                               |
| 3.0                   | 5.1                            | 4.5                            | 2.7                               |
| 4.0                   | 3.9                            | 3.4                            | 5.1                               |

a: M\* method. b: hinge point method.

**Table S5.** Apparent weight average molar masses  $M_{w,app}$  (M\* method) and polydispersity  $\mathcal{D}$  values for PS550 in isopropanol.

| Concentration (mg/mL) | $M_{w,app}$ (kDa) | $\mathcal{D}$ ( $M_z/M_{w,app}$ ) |
|-----------------------|-------------------|-----------------------------------|
| 3.0                   | 1.6               | 1.8                               |
| 4.0                   | 1.5               | 1.8                               |

**(a)**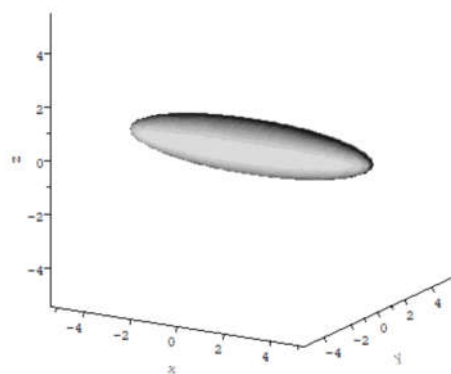

$$a/b = 5.19 \quad b/c = 1.00$$

**(b)**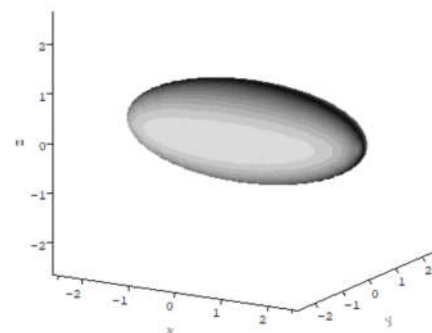

$$a/b = 2.52 \quad b/c = 1.00$$

**(c)**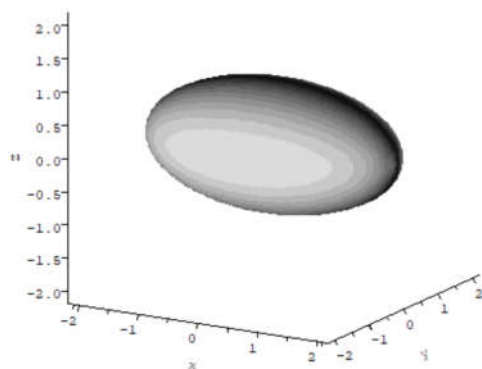

$$a/b = 2.08 \quad b/c = 1.00$$

**(d)**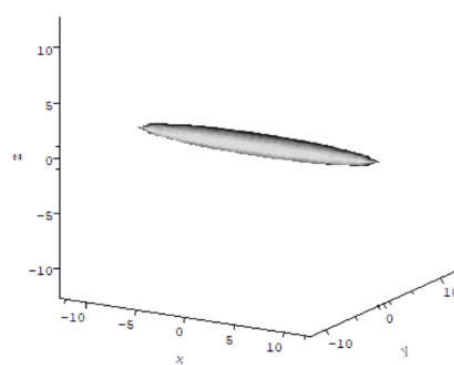

$$a/b = 12.10 \quad b/c = 1.00$$

**(e)**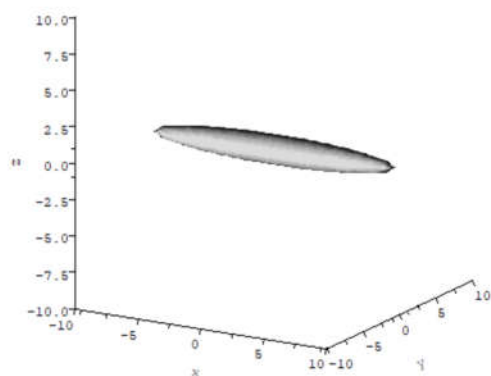

$$a/b = 9.55 \quad b/c = 1.00$$

**(f)**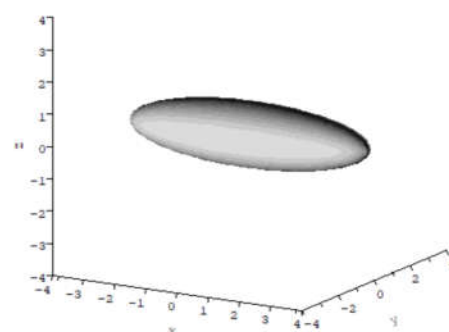

$$a/b = 3.81 \quad b/c = 1.00$$

**Figure S1.** Conformations (equivalent hydrodynamic ellipsoids) for  $\nu$  at  $(v_s/\bar{v}) = 1.2$  using the programme ELLIPS1. (a) = PS18000 in isopropanol; (b) = PS4200 in isopropanol; (c) = PS550 in isopropanol; (d) P36000 in turpentine; (e) = PS18000 in turpentine; (f) = P4200 in turpentine.
